# Supplementary material for: Constructing a Visible-Active CoFe2O4@Bi2O3/NiO Nanoheterojunction as Magnetically Recoverable Photocatalyst with Boosted Ofloxacin Degradation Efficiency
Source: Molecules. 2022 Nov 25;27(23):8234. doi: 10.3390/molecules27238234 (PMC9741353; doi:10.3390/molecules27238234)
Supplement: Supplementary file 1 [file molecules-27-08234-s001.zip › molecules-1924400-supplementary.pdf]

# Constructing a Visible-Active $\text{CoFe}_2\text{O}_4@\text{Bi}_2\text{O}_3/\text{NiO}$ Nanoheterojunction as Magnetically Recoverable Photocatalyst with Boosted Ofloxacin Degradation Efficiency

Pooja Dhiman <sup>1</sup>, Gaurav Sharma <sup>1,2,3,\*</sup>, Abdullah N. Alodhayb <sup>4</sup>, Amit Kumar <sup>1</sup>, Garima Rana <sup>1</sup>, Thandiwe Sithole <sup>3</sup> and Zeid A. AlOthman <sup>2</sup>

<sup>1</sup> International Research Centre of Nanotechnology for Himalayan Sustainability (IRC NHS), Shoolini University, Solan 173229, India

<sup>2</sup> Department of Chemistry, College of Science, King Saud University, Bldg. #5, Riyadh 11451, Saudi Arabia

<sup>3</sup> Department of Chemical Engineering, University of Johannesburg, P.O. Box 17011, Doornfontein 2088, South Africa

<sup>4</sup> Department of Physics and Astronomy, College of Science, King Saud University, Riyadh 11451, Saudi Arabia

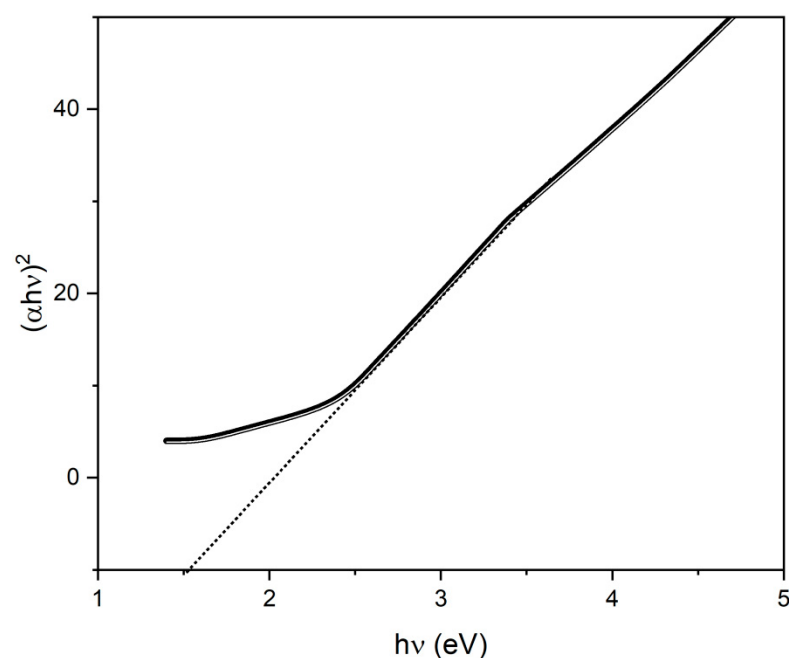

**Figure S1.** Tauc plot for CBN heterojunction.

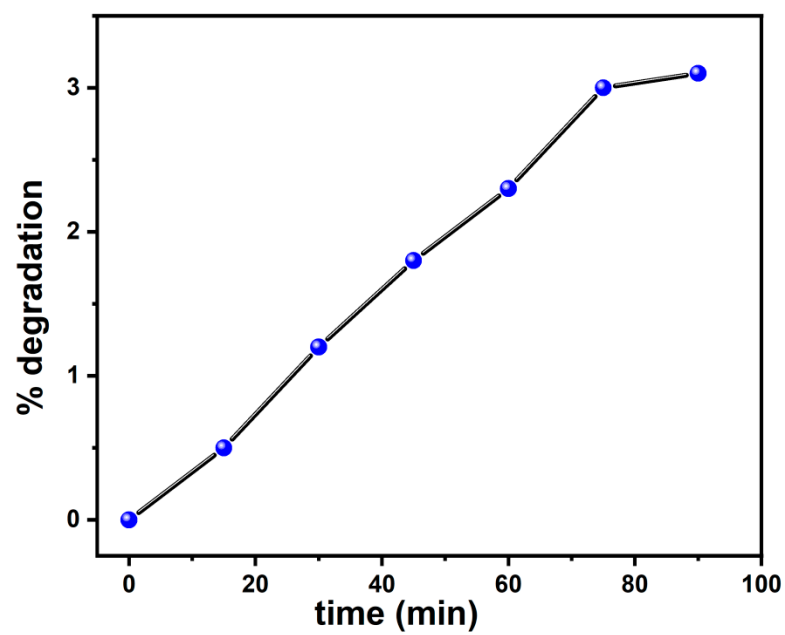

Figure S2. Plain photolysis of OFL under visible light.

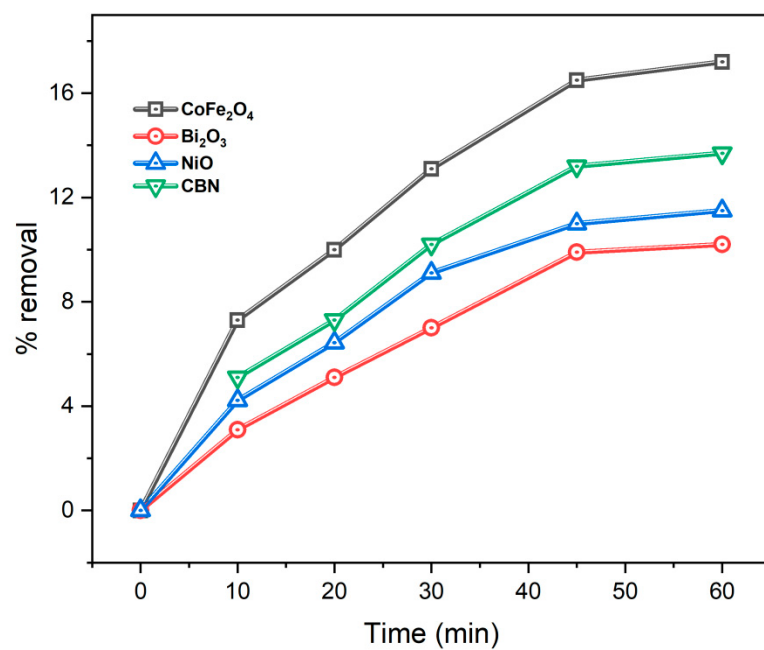

Figure S3. Adsorptional removal of OFL in dark.

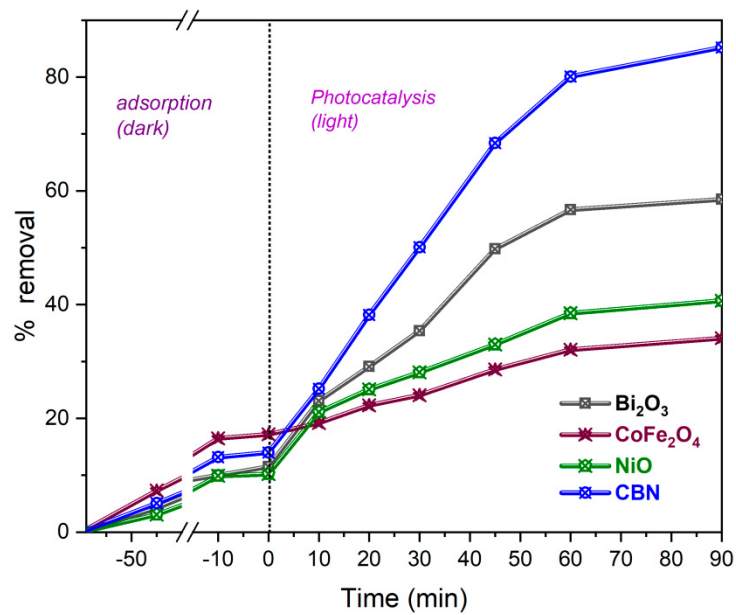

**Figure S4.** Removal of OFL: 60 min dark followed by 90 min visible light exposure.

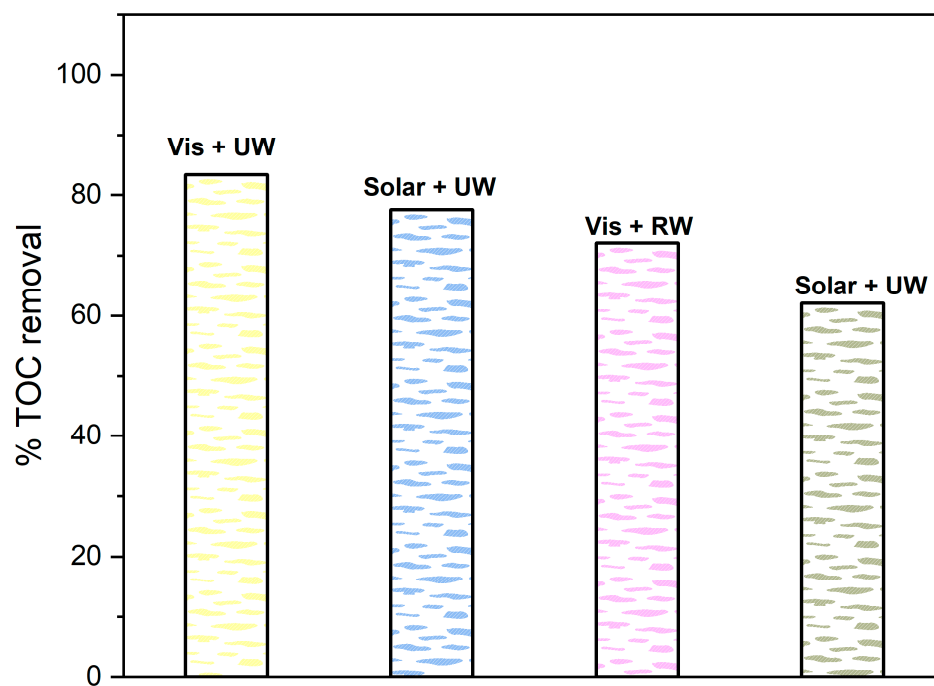

**Figure S5.** TOC removal during OFL degradation with CBN under visible light exposure.

**Table S1.** Elemental presence derived from XPS spectra for Bi<sub>2</sub>O<sub>3</sub>, NiO, and CBN.

| <b>XPS peak parameters for Bi<sub>2</sub>O<sub>3</sub> sample</b> |                |                |                        |                 |
|-------------------------------------------------------------------|----------------|----------------|------------------------|-----------------|
| <b>Name</b>                                                       | <b>Peak BE</b> | <b>FWHM eV</b> | <b>Area (P) CPS.eV</b> | <b>Atomic %</b> |
| <b>O1s</b>                                                        | 530.4          | 2.98           | 1066199.51             | 45.77           |
| <b>C1s</b>                                                        | 285.15         | 2.91           | 343964.65              | 35.74           |
| <b>Bi4f</b>                                                       | 159.09         | 2.58           | 7363374.52             | 18.49           |
| <b>XPS peak parameters for NiO sample</b>                         |                |                |                        |                 |
| <b>Name</b>                                                       | <b>Peak BE</b> | <b>FWHM eV</b> | <b>Area (P) CPS.eV</b> | <b>Atomic %</b> |
| <b>O1s</b>                                                        | 530.15         | 3.08           | 1221510.08             | 43.5            |
| <b>Ni2p</b>                                                       | 855.23         | 4.58           | 5247831.54             | 35.25           |
| <b>C1s</b>                                                        | 285.26         | 2.83           | 246434.75              | 21.25           |
| <b>XPS peak parameters for CBN sample</b>                         |                |                |                        |                 |
| <b>Name</b>                                                       | <b>Peak BE</b> | <b>FWHM eV</b> | <b>Area (P) CPS.eV</b> | <b>Atomic %</b> |
| <b>O1s</b>                                                        | 530.05         | 2.9            | 1252119.31             | 43.95           |
| <b>C1s</b>                                                        | 285.17         | 3.06           | 329631.18              | 28.01           |
| <b>Fe2p</b>                                                       | 711.09         | 5.59           | 1433869.92             | 11.82           |
| <b>Bi4f</b>                                                       | 158.92         | 2.64           | 3968225.15             | 8.15            |
| <b>Ni2p3</b>                                                      | 855.2          | 3.96           | 444421.36              | 4.31            |
| <b>Co2p</b>                                                       | 780.56         | 3.13           | 541023.13              | 3.76            |
